# Supplementary material
Source: ML conference proceedings conference paper supplement (https://proceedings.neurips.cc/paper_files/paper/2020/hash/c519d47c329c79537fbb2b6f1c551ff0-Abstract.html)
Supplement: Supplementary file [file c519d47c329c79537fbb2b6f1c551ff0-Supplemental.pdf]

## A Proof of ReLU Balancing Rule

We present the proof of Lemma 3.1 here.

*Proof.* We seek to optimize the number of trainable parameters, i.e.:

$$\max \sum_{i \in [0, D-1]} F^2 C_i^2$$

subject to a constraint on the total number of ReLUs, which we can write as:

$$\sum_{i \in [0, D-1]} \frac{W_0^2}{\alpha^{2i}} C_i \leq R_{bdg}.$$

To solve this problem, we maximize its Lagrangian:

$$\max \sum_{i \in [0, D-1]} F^2 C_i^2 - \lambda \left( \sum_{i \in [0, D-1]} \frac{W_0^2}{\alpha^{2i}} C_i - R_{bdg} \right)$$

Setting derivatives with respect to  $C_i$  to zero, we get  $C_i = \frac{\lambda W_0^2}{2F^2 \alpha^{2i}}$  and hence,  $C_{i+1} = \alpha^2 C_i$ .  $\square$

## B CryptoNAS Generalized to Other Networks

Table 4 explores ReLU balanced channel scaling for original wide residual networks, as well as models scaled to lower ReLU budgets (WRN-16-4 and WRN-16-2). We observe that ReLU balanced models have more parameters and improve accuracy compared to FLOP balanced models for the same ReLU budget.

Table 4: Exploring ReLU ballancing in Wide ResNet architectures.

| Model     | ReLU Budget | FLOP Balanced |        | ReLU Balanced |        |
|-----------|-------------|---------------|--------|---------------|--------|
|           |             | Params        | Acc    | Params        | Acc    |
| WRN-16-2  | 245K        | 703K          | 94.06% | 2.6M          | 94.89% |
| WRN-16-4  | 475K        | 2.8M          | 95.39% | 10.4M         | 95.6%  |
| WRN-16-8  | 933K        | 11.0M         | 95.73% | 42M           | 96.01% |
| WRN-40-4  | 1392K       | 8.9M          | 95.47% | 36M           | 96.28% |
| WRN-28-10 | 2310K       | 36.5M         | 96.00% | 144M          | 96.28% |
